# Supplementary material
Source: publisher figshare collection journal article supplement (https://karger.figshare.com/ndownloader/files/26848538)
Supplement: Supplementary file 1 [file 26848538]

| a |
| --- |
| *(a*) Fe-s cluster domain(N-terminal) DNA binding (C-terminal)  3 17 18 60  KS WhiB1 ------------------MDWRSKAACLDEDPELFFPIGNT-GPA-IEQIEKAKKVCARCEVTETCLQWAIETGQDAGVWGGLSEDERRALKRRNA--RARRAS--- 82  KS WhiB2 ----VHELQIVGHPEQAVPSWQERALCAQTDPEAFFPEKGG-S------TREAKRVCTGCDVRSECLDYALENDERFGIWGGLSERERRKLKRRAV--FTA------ 88  KS WhiB3 ----MDSTARQPGPVADLWDWQFEGLCRTTDPEEFFHPEGERGSARRLRDERAKRVCQRCPVILECREHALAAKEPYGVWGGLSEDEREQELARRS---RRGLRGA- 99  KS WhiB7 ----MLALADHQTLIDQARVAGRPLPCLENDPDTWFADTPT-G------VEYAKSLCHACPVRTLCLEGALERREPWGVWGGELIEAGRVLPRKRPRGRPRKHPIAA 96  3 17 18 60  Mtb whiB1 ------------------MDWRHKAVCRDEDPELFFPVGNS-GPA-LAQIADAKLVCNRCPVTTECLSWALNTGQDSGVWGGMSEDERRALKRRNA--RTKARTGV- 93  Mtb whiB2 LVPEAPAPFEEPLPPEATDQWQDRALCAQTDPEAFFPEKGG-S------TREAKKICMGCEVRHECLEYALAHDERFGIWGGLSERERRRLKRGII----------- 89  Mtb whiB3 ----MPQPEQLPGPNADIWNWQLQGLCRGMDSSMFFHPDGERGRARTQREQRAKEMCRRCPVIEACRSHALEVGEPYGVWGGLSESERDLLLKGTM-GRTRGIRRTA 103  Mtb whiB7 -------VSVLTVPRQTPRQRLPVLPCHVGDPDLWFADTPA-G------LEVAKTLCVSCPIRRQCLAAALQRAEPWGVWGGEIFDQGSIVSHKRPRGRPRKDAVA- 92  * * . :* . ** :* * : * *: : *:***  Variable region functional region |
| b |
| *(* ND1  Mtb SigA ------------------------------------------------------------------------------------------------------ 102  KS SigA VTPPTSEKSAETPTVSEPVTAVLGKQLLDKPGLIEFVERAVDNGKVATDKVQQAIEGASLTPTQAQRLLKNLRSQGVEVHFDQETAARLAQEQRGVKPRASR 0  ND1    Mtb SigA VAAT-----KASTATDEPVKRTATKSPAASASGAK-TGAKRTAAKSASGSPP-AKR—-ATKPAARSVKPASAPQDTTTSTIPKRKTRAAAKSAAAKAPSARG 203  KS SigA SRTTRSTTAKTATAKSTTAKSTATKSTTAKSTAAKSTTAKSTAAKSTAAKSTTAKSTTAKSTAAKSTTAASGTSAKGT-ASTTRKATTAAKGTAAKSTTAKG 93  :* *::**.. .* ***** :*.::.** * ** *****::.. ** *.. **:*.. **. . . * : .**: :***.:***: :*:*  ND1  Mtb SigA HATKPRAPKDAQHEAATDPEDALDSVEELDAEPDLDVEPGEDLDLDAADLNLDDLEDDVAPDADDDLDSGDDEDHEDLEAEAAVAPGQTADDDEEIAEPTEK 270  KS SigA RTAAKGTTKSAAE---TNARNA------AADAPELDEIAAEDEAEERAA-----------------LA-GK—-D------TVELVAGETSQAAPQKAESTEE 195  ::: : *.* . *: .:* *:** .** : * * *. * . :. *:*:: : ** **:  ND1  Mtb SigA DKASGDFVWDEDESEALRQARKDAELTASADSVRAYLKQIGKVALLNAEEEVELAKRIEAGLYATQLMTELSERGEKLPAAQRRDMMWICRDGDRAKNHLLE 367  KS SigA ESESRGFVLRADDEDDA-PAQQVVTAGATADAVKDYLKQIGKVALLNAEQEVDLAKRIEAGLFAEQRL----NSGDKIDAKLKRELWWVASDGKNAKNHLLE 297  :. * .** *:.: *:: . *:**:*: **************:**:*********:* * : : *:*: * :*:: *:. **..*******  ND1 ND2  Mtb SigA ANLRLVVSLAKRYTGRGMAFLDLIQEGNLGLIRAVEKFDYTKGYKFSTYATWWIRQAITRAMADQARTIRIPVHMVEVINKLGRIQRELLQDLGREPTPEEL 469  KS SigA ANLRLVVSLAKRYTGRGMLFLDLIQEGNLGLIRAVEKFDYTKGYKFSTYATWWIRQAITRAMADQARTIRIPVHMVEVINKLARVQRQMLQDLGREPTPEEL 399  ****************** ***************************************************************.*:**::*************  ND2 LD CD    Mtb SigA AKEMDITPEKVLEIQQYAREPISLDQTIGDEGDSQLGDFIEDSEAVVAVDAVSFTLLQDQLQSVLDTLSEREAGVVRLRFGLTDGQPRTLDEIGQVYGVTRE 571  KS SigA AKELDMTPEKVVEVQKYGREPISLHTPLGEDGDSEFGDLIEDSEAVVPSDAVSFTLLQEQLHSVLDTLSEREAGVVSMRFGLADGQPKTLDEIGRVYGVTRE 501  ***:*:*****:*:*:*.******. :*::***::**:******** *********:**:************** :****:****:******:*******  CD  Mtb SigA RIRQIESKTMSKLRHPSRSQVLRDYLD 598  KS SigA RIRQIESKTMSKLRHPSRSQVLRDYLD 528  *************************** |
| c |
| KS SigB VIHDDFPARTHGASHAVPD----Q-ALVRRRLTAAHALPEQHRQQELIDVIADHIPFARR 55  Mtb SigF -----MTARAAGGSASRANEYADVPEMFRELVGLPAGSPEFQR--HRDKIVQRCLPLADH 53  : **: *.* : : :.*. : . ** :* . .:: :*:* :  KS SigB LGRRFAPTPSLVDDCEQVACMALVLAVQRWDPAFDANLSSYAQPTILGELRRFLRDSTWW 115  Mtb SigF IARRFEGRGEPRDDLIQVARVGLVNAAVRFDVKTGSDFVSFAVPTIMGEVRRHFRDNSWS 113  :.*** . ** *** :.** *. *:* .::: *:* ***:**:**.:**.:*  KS SigB VRPPRRIQELAALVRSTEEELRHSTGREPTAQEVARAVGASPDEVSEARVAAAGRYVASV 175  Mtb SigF VKVPRRLKELHLRLGTATADLSQRLGRAPSASELAAELGMDRAEVIEGLLAGSSYHTLSI 173  *: ***::** : :: :* : ** *:*.*:* :* . ** *. :*.:. :. *:  KS SigB DEEDPETG---RLVHL-----VHSPAVDEWVSLHPHIQALDPRDRCVLLRRYLEDETQAS 227  Mtb SigF DSGGGSDDDARAITDTLGDVDAGLDQIENREVLRPLLEALPERERTVLVLRFFDSMTQTQ 233  *. . . . :.. . ::: *:* ::** *:* **: *:::. **:.  KS SigB IARALGISQAQVSRRLKRALDTLREQVPGGLSNA 261  Mtb SigF IAERVGISQMHVSRLLAKSLARLRDQLE------ 261  **. :**** :*** * ::* **:*: |
| d |
| KS SigH MTPTTSEKPRSEVNSDPAEVDVATETPQERAARFEREALPHLDQLYSAALRTTRNPTDAE 60  Mtb SigH MADIDGV-----TGSAGLQPGPSEETDEELTARFERDAIPLLDQLYGGALRMTRNPADAE 55  *: . ..* : . : ** :* :*****:*:* *****..*** ****:***  KS SigH DLVQETYAKAYAAFHQYKPGTNLKAWMYRILTNTYINTYRKKQRQPLQSDAAEVEDYQLA 120  Mtb SigH DLLQETMVKAYAGFRSFRHGTNLKAWLYRILTNTYINSYRKKQRQPAEYPTEQITDWQLA 115  **:*** .****.*:.:: *******:**********:******** : : :: *:***  KS SigH AAESHTAKGLRSAETEALDHIADSQVTDALAQLSEEFRLAVYLADVEGFAYKEIAEIMDT 180  Mtb SigH SNAEHSSTGLRSAEVEALEALPDTEIKEALQALPEEFRMAVYYADVEGFPYKEIAEIMDT 175  : .*::.******.***: : *:::.:** * ****:*** ****** **********  KS SigH PIGTVMSRLHRGRKQLRELLAEYGAERGFGRQSQGKEVSS- 220  Mtb SigH PIGTVMSRLHRGRRQLRGLLADVARDRGFARGEQAHEGVSS 216  *************:*** ***: . :***.* .*.:* * |
| e |
| KS SigJ MEMSRVDLERFEVARGRLGAVAYRLLGSASEAEDVVQESFVRWQAADRGRIEVPVAWLTK 60  Mtb SigJ -----MEVSEFEALRQHLMSVAYRLTGTVADAEDIVQEAWLRWDSPDT-VIADPRAWLTT 54  :::..**. * :* :***** *:.::***:***:::**:: * * * ****.  KS SigJ VVTNLCLNQLTSARSRREEYVGQWLPEPLLDGDPMLGPAETLEQRGSVSLAMLMILETLS 120  Mtb SigJ VVSRLGLDKLRSAAHRRETYTGTWLPEPVVTGLDATDPLAAVVAAEDARFAAMVVLERLR 114  **:.* *::* ** *** *.* *****:: * .* :: .. :* :::** *  KS SigJ PTERAVYVLREAFAVPHGEIAEILETTPAATQQALSRAKSRIASLSHRHRTEADPVAARA 180  Mtb SigJ PDQRVAFVLHDGFAVPFAEVAEVLGTSEAAARQLASRARKAVTAQPALISGDPDPA-HNE 173  * :*..:**::.****..*:**:* *: **::* ***:. ::: : **. .  KS SigJ IVEEFLAAATSGRVENLVRLLTDDAFGIGDGGGAVPARPKPVLGAQSVAKMLRGLAVPSA 240  Mtb SigJ VVGRLMAAMAAGDLDTVVSLLHPDVTFTGDSNGKAPTAVRAVRGSDKVVRFILGLVQRYG 233  :* .::** ::* ::.:* ** *. **..* .*: : * *::.*.::: **. .  KS SigJ A------KRELAGGSLDCHFALVNTSPALVAVVAGRVVGVIVLDIADGRISVVRIQANPH 294  Mtb SigJ PGLFGANQLALVNGELGAYTAGL---PGVDG-YRAMAPRITAITVRDGKVCALWDIANPD 289  : *..*.*..: * : *.: . . . : .: : **::..: ***.  KS SigJ KLDRATR-RWAASPHGRPLLSGW 316  Mtb SigJ KFTGSPLKERRAQPTGRGRHHRN 312  *: : . *.* ** |
| Supplementary fig 2: Alignment of Wbl and major sigma factor A,B, H and J proteins between *K. sedentarius* MBB13 (KS) and *M. tuberculosis* H37Rv (Mtb) amino acid sequences. (a) The conserved cysteines residues, unique G(I/V)WGG domain (tryptophan containing) and AT-hook (of Wbl7) of Wbl proteins are highlighted. The conserved residues, Trp3, Phe17, Phe18 and Trp60 of the [4Fe–4S] cluster binding pocket of WhiB1 are underlined. (b) The Sigma factor N-terminal 1 and 2, linker and C-terminal domains are indicated as ND1, ND2, LD and SD respectively. The conserved residues, His516 and Pro517 of Sigma factor ACTD are underlined (c, d and e) Sigma factors similarity B, H and J respectively. *Mycobacterium tuberculosis* H37Rv was obtained from [ncbi.nlm.nih.gov](file:///C:\Users\mahadlaq\Desktop\رد%20جف\ncbi.nlm.nih.gov) (RefSeq NC_000962.3). |
